# Supplementary material for: A fluorescence probe based on 6-phenylimidazo[2,1-b]thiazole and salicylaldehyde for the relay discerning of In3+ and Cr3+
Source: Royal Society of Chemistry journal article supplement (doi:10.1039/c9nj05722f), 2019-11-27
Supplement: c9nj05722f1.pdf [file c9nj05722f1.pdf]

## Supporting information

A fluorescence probe based on 6-phenylimidazo[2,1-b]thiazole and  
salicylaldehyde for relay discerning of  $\text{In}^{3+}$  and  $\text{Cr}^{3+}$

Bing Li,<sup>a</sup> Xiaodong Shang<sup>b,\*</sup>, Linlin Li,<sup>a</sup> Yuankang Xu,<sup>a</sup> Hanyu  
Wang,<sup>a</sup> Xiaofeng Yang,<sup>a</sup> Meishan Pei,<sup>a</sup> Ruiqing Zhang,<sup>a</sup> Guangyou  
Zhang<sup>a,\*</sup>

<sup>a</sup>*School of Chemistry and Chemical Engineering, University of Jinan,  
Jinan 250022, China. Email address: chm\_zhanggy@ujn.edu.cn*

<sup>b</sup>*Henan Sanmenxia Aoke Chemical Industry Co. Ltd., Sanmenxia  
472000, China. E-mail address: dong19840814.love@163.com*

*\*Corresponding author: Guangyou Zhang, E-mail address:  
chm\_zhanggy@ujn.edu.cn. Xiaodong Shang, E-mail address:  
dong19840814.love@163.com*

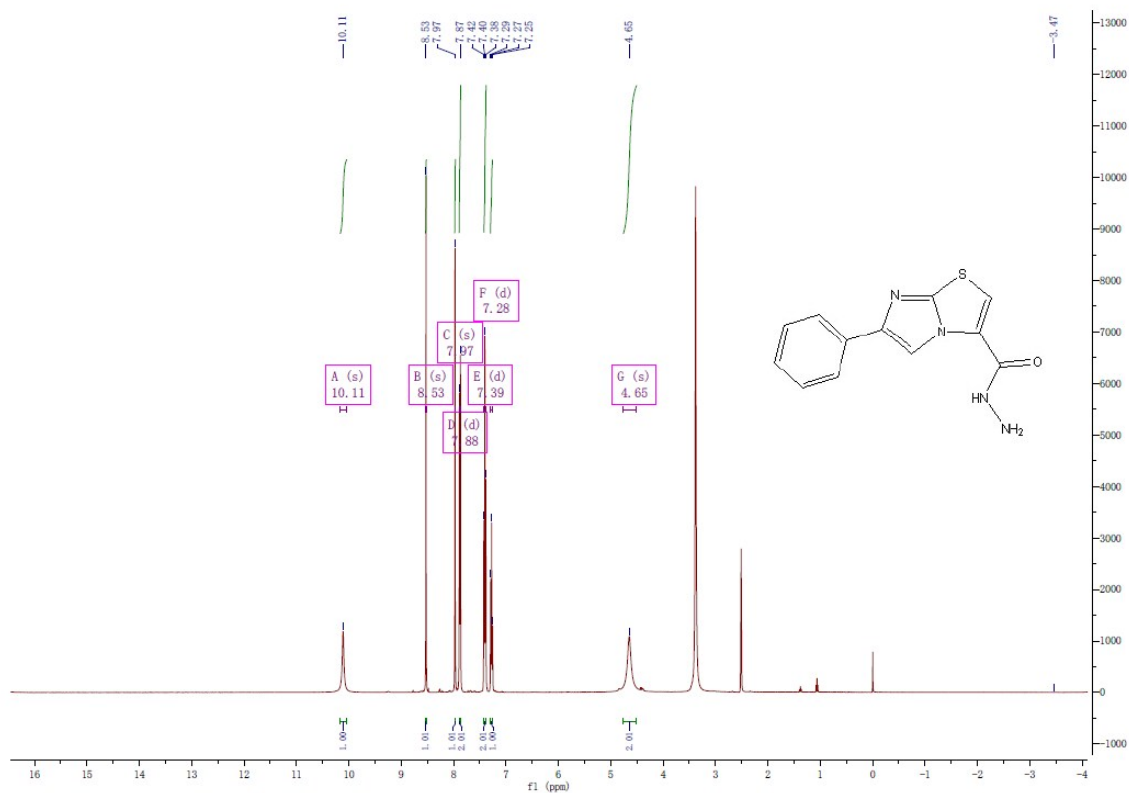

Fig.S1. <sup>1</sup>H NMR spectrum of compound 3.

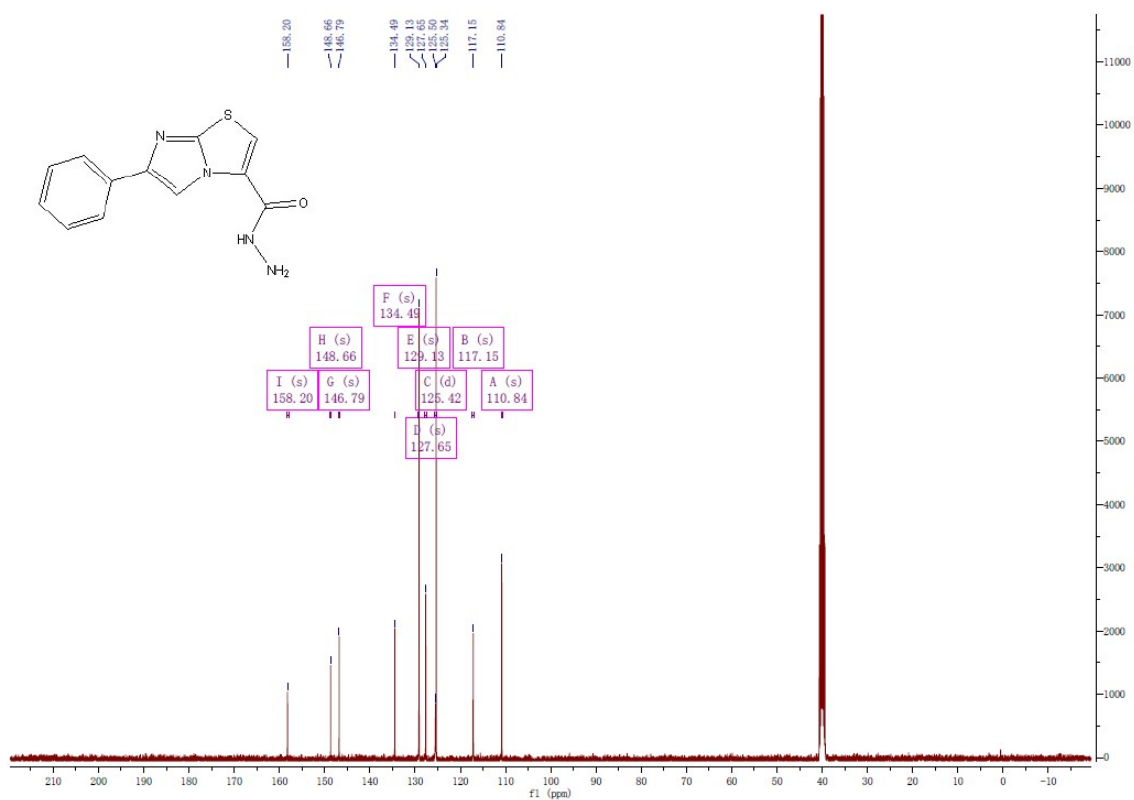

Fig.S2. <sup>13</sup>C NMR spectrum of compound 3.

|               |               |             |        |                 |              |                        |                       |
|---------------|---------------|-------------|--------|-----------------|--------------|------------------------|-----------------------|
| Sample Name   | 190717-L-01   | Position    | P1-F2  | Instrument Name | Instrument 1 | User Name              |                       |
| Inj Vol       | -1            | InjPosition |        | SampleType      | Sample       | IRM Calibration Status | Success               |
| Data Filename | 190717-L-01.d | ACQ Method  | 0103.m | Comment         |              | Acquired Time          | 7/17/2019 12:13:23 AM |

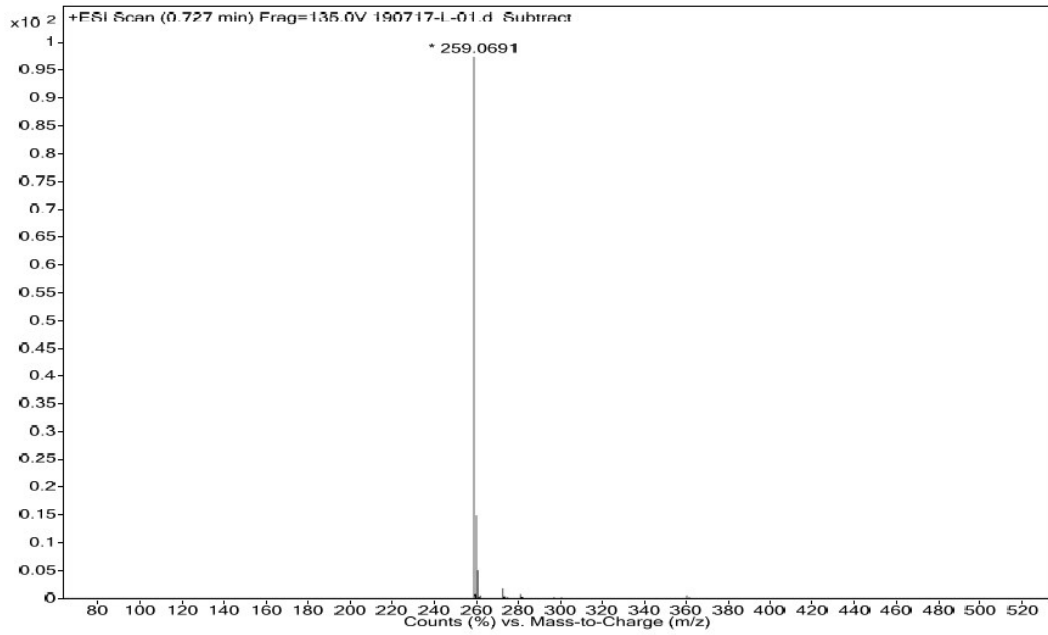

Fig.S3.ESI mass spectrum of compound 3

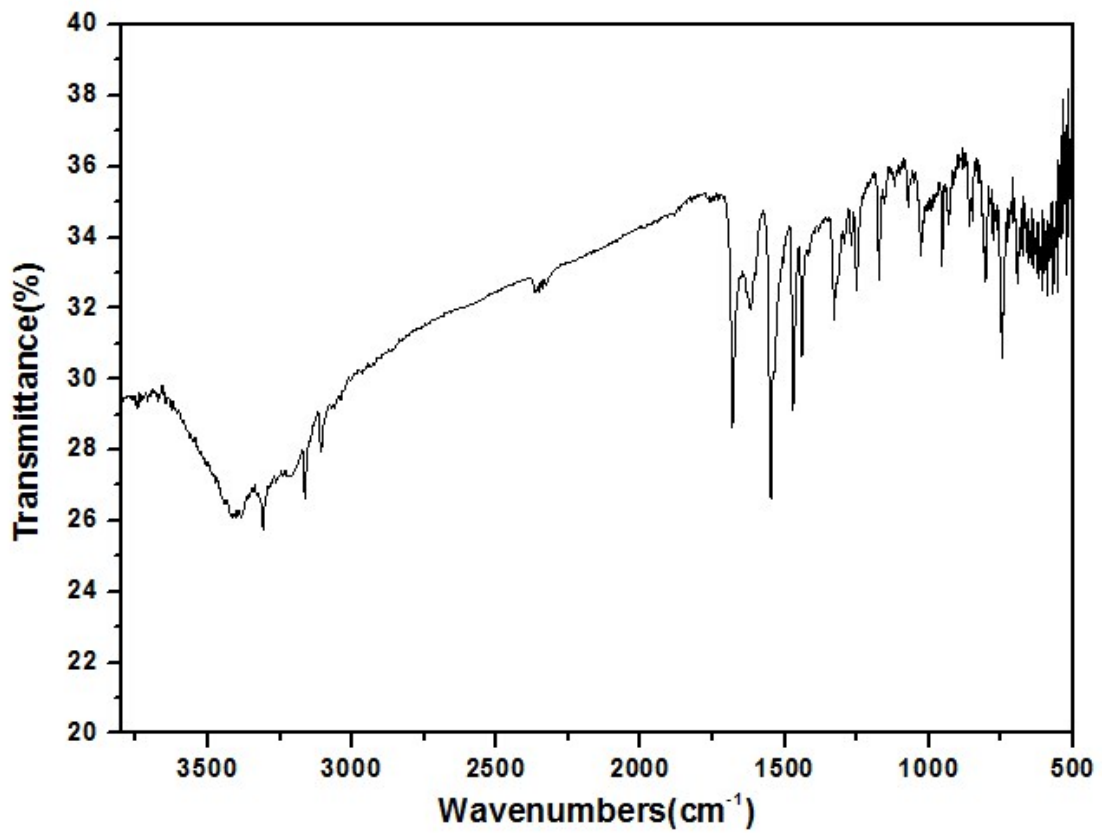

Fig.S4.The FTIR spectra of compound 3

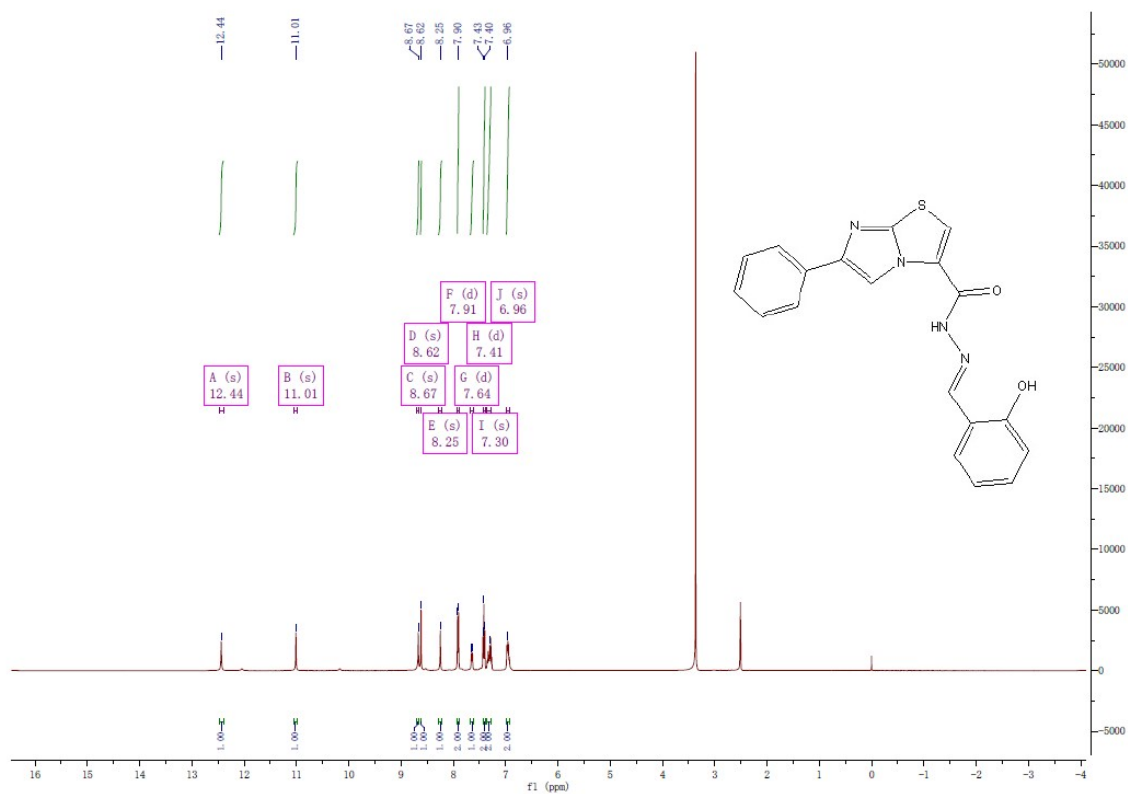

Fig.S5. <sup>1</sup>H NMR spectrum of LB1.

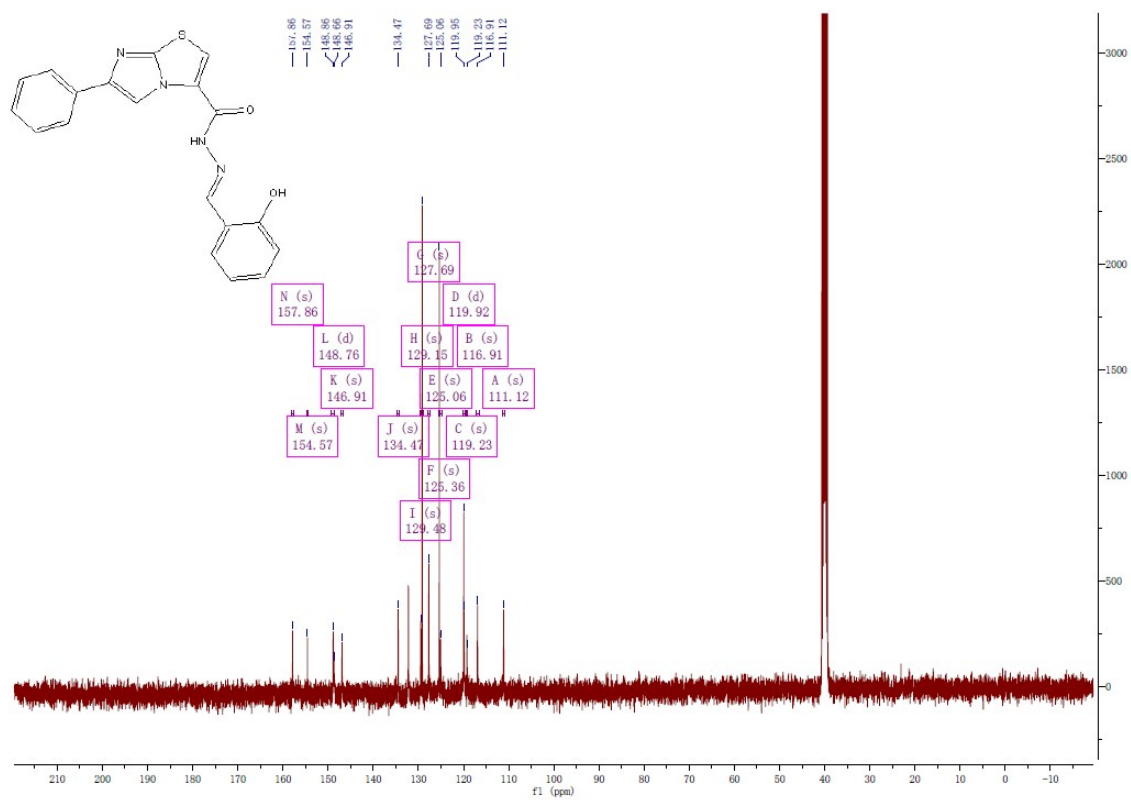

Fig.S6. <sup>13</sup>C NMR spectrum of LB1

|               |               |             |        |                 |              |                        |                       |
|---------------|---------------|-------------|--------|-----------------|--------------|------------------------|-----------------------|
| Sample Name   | 190717-L-02   | Position    | P1-E2  | Instrument Name | Instrument 1 | User Name              |                       |
| Inj Vol       | -1            | InjPosition |        | SampleType      | Sample       | IRM Calibration Status | Success               |
| Data Filename | 190717-L-02.d | ACQ Method  | 0103.m | Comment         |              | Acquired Time          | 7/17/2019 12:46:35 AM |

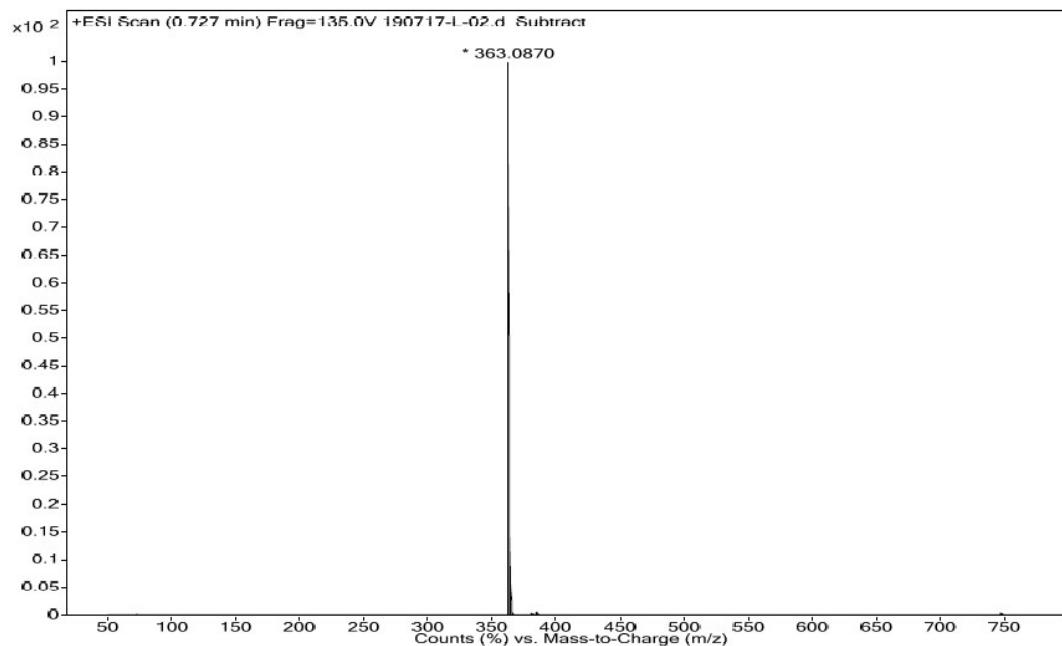

Fig.S7.ESI mass spectrum of **LB1**

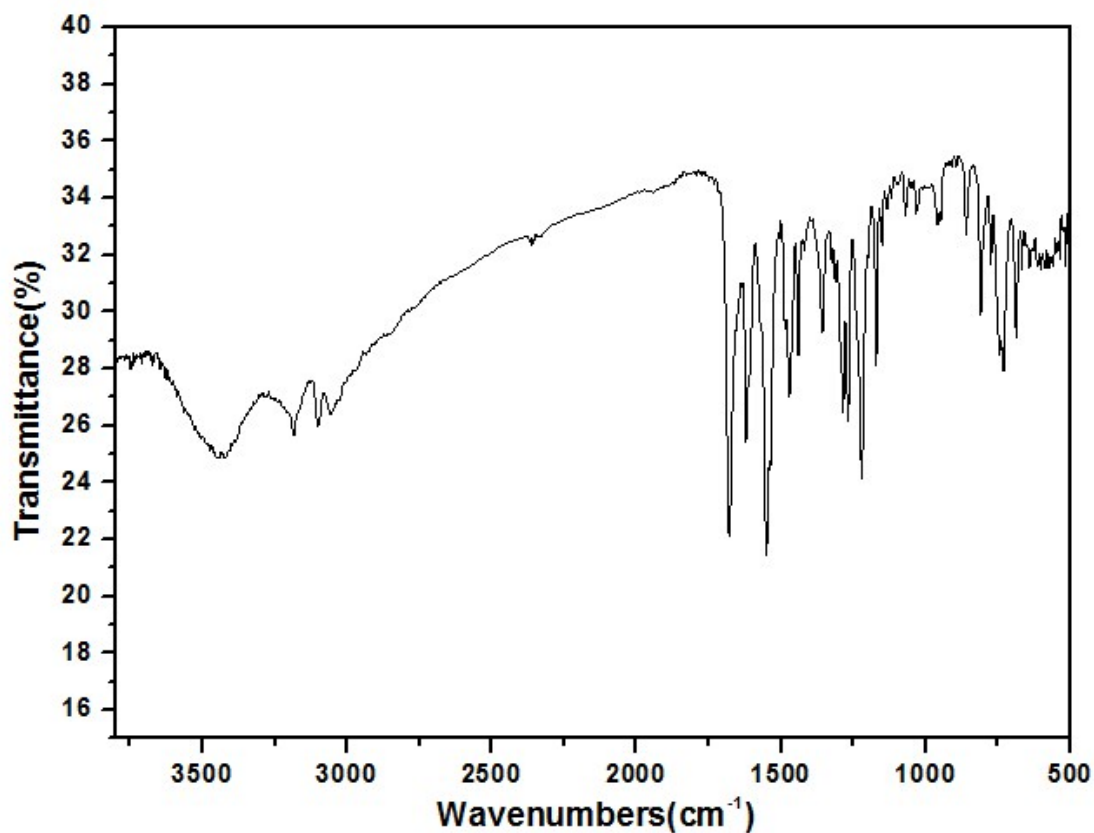

Fig.S8.The FTIR spectra of **LB1**

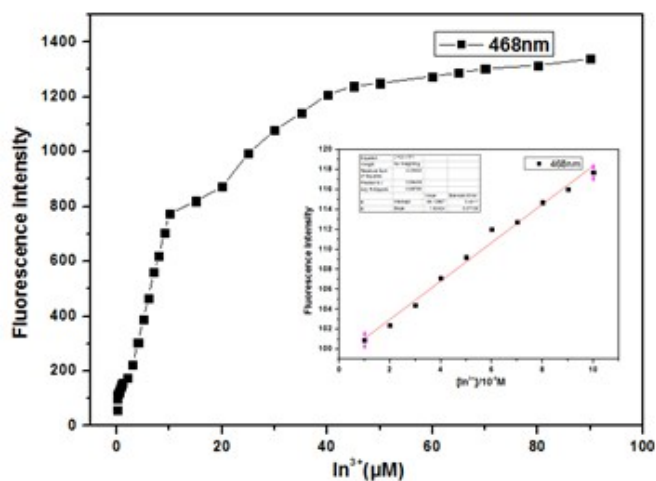

Fig.S9. Linear response of the emission intensity changes of **LB1** with the concentration of  $\text{In}^{3+}$ . Excitation is at 365 nm.

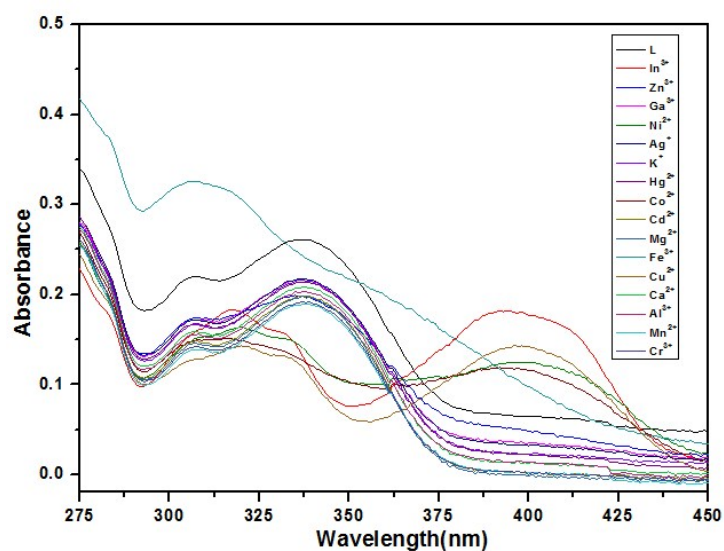

Fig.S10. Absorption spectra of **LB1** ( $1 \times 10^{-5}$  M) in DMF/ $\text{H}_2\text{O}$  (9:1, v/v) containing Tris (0.01 M, pH=7.4) buffer solution in the presence of various metal ions ( $\text{Mg}^{2+}$ ,  $\text{Cu}^{2+}$ ,  $\text{Co}^{2+}$ ,  $\text{Al}^{3+}$ ,  $\text{Hg}^{2+}$ ,  $\text{Ag}^+$ ,  $\text{Mn}^{2+}$ ,  $\text{Ga}^{3+}$ ,  $\text{K}^+$ ,  $\text{Ca}^{2+}$ ,  $\text{Ni}^{2+}$ ,  $\text{Fe}^{3+}$ ,  $\text{Cd}^{2+}$ ,  $\text{Cr}^{3+}$  and  $\text{Zn}^{2+}$ )

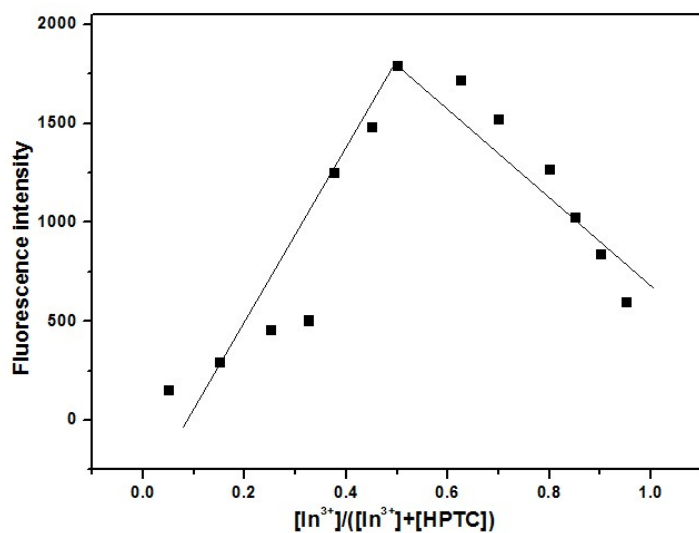

Fig.S11. Job's plot of the **LB1+In<sup>3+</sup>** complex in DMF/H<sub>2</sub>O (9:1, v/v) containing Tris (0.01 M, pH=7.4) at 25 °C. The total concentration of LB1 and In<sup>3+</sup> was 0.1 mM. Excitation is at 365 nm, and emission was monitored at 468 nm.

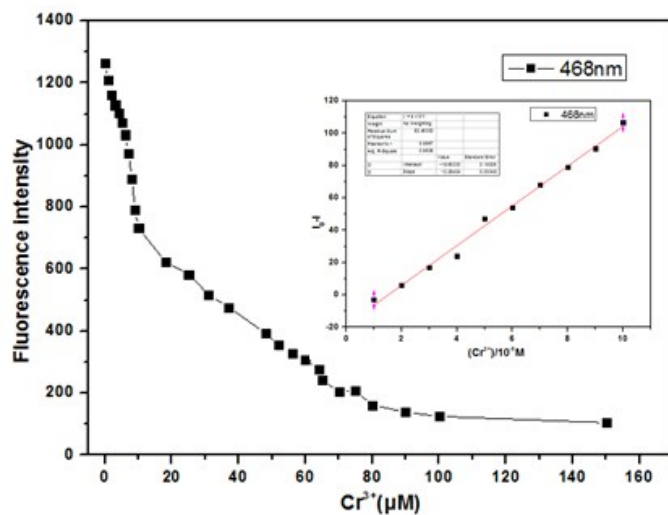

Fig.S12. Change ratio of [LB1 + In<sup>3+</sup>] ( $1 \times 10^{-5}$  M) in DMF/H<sub>2</sub>O (9 : 1, v/v, Tris 0.01 M, pH= 7.4) upon titration with Cr<sup>3+</sup> ( $1 \times 10^{-6}$  M). Emission is monitored at 468 nm.

| Sample Name   | 190720-LB-03   | Position    | P1-E2  | Instrument Name | Instrument 1 | User Name              |                       |
|---------------|----------------|-------------|--------|-----------------|--------------|------------------------|-----------------------|
| Inj Vol       | -1             | InjPosition |        | SampleType      | Sample       | IRM Calibration Status | Success               |
| Data Filename | 190720-LB-03.d | ACQ Method  | 0103.m | Comment         |              | Acquired Time          | 7/20/2019 10:02:23 PM |

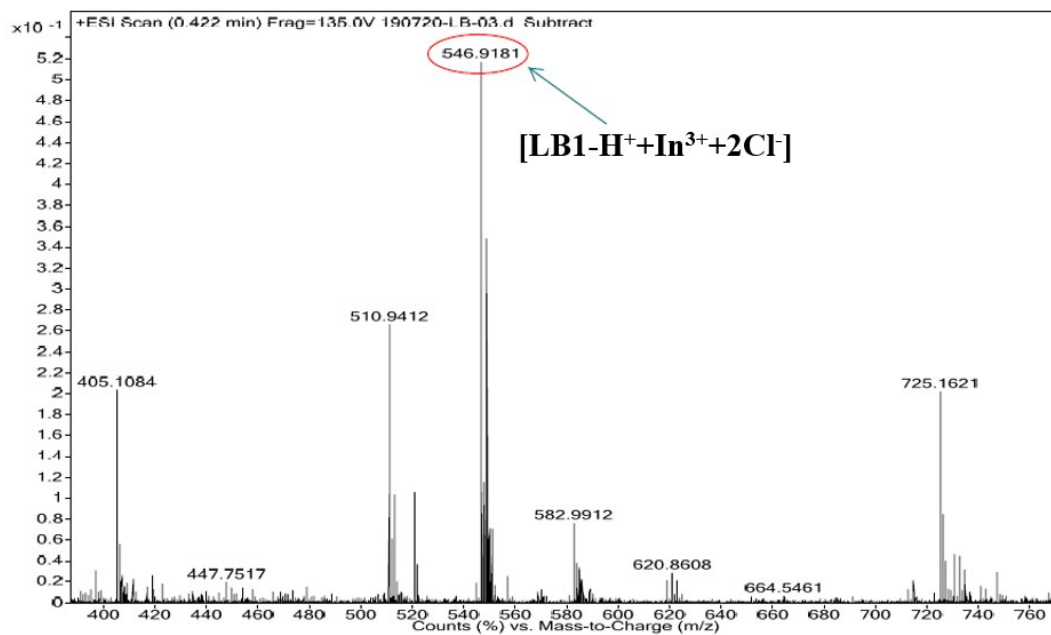

Fig.S13. ESI mass spectrum of complex  $[LB1+In^{3+}]$ .

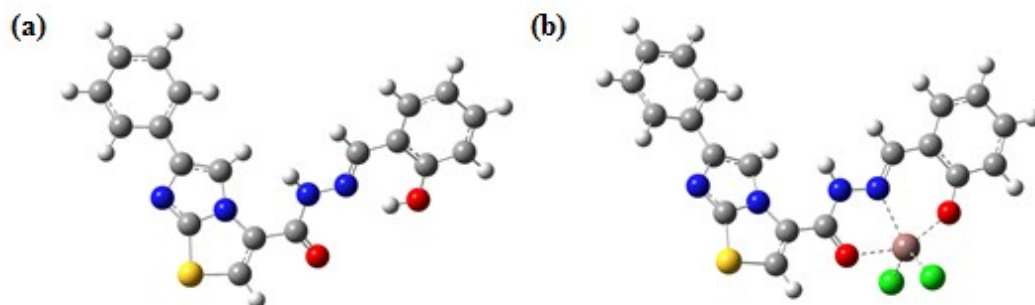

Fig.S14. XYZ coordination of the optimized structure of LB1 (a) and  $LB1+In^{3+}$  (b).



|               |                |             |        |                 |              |                        |                       |
|---------------|----------------|-------------|--------|-----------------|--------------|------------------------|-----------------------|
| Sample Name   | 190720-LB-04   | Position    | P1-D2  | Instrument Name | Instrument 1 | User Name              |                       |
| Inj Vol       | -1             | InjPosition |        | SampleType      | Sample       | IRM Calibration Status | Success               |
| Data Filename | 190720-LB-04.d | ACQ Method  | 0103.m | Comment         |              | Acquired Time          | 7/20/2019 10:04:38 PM |

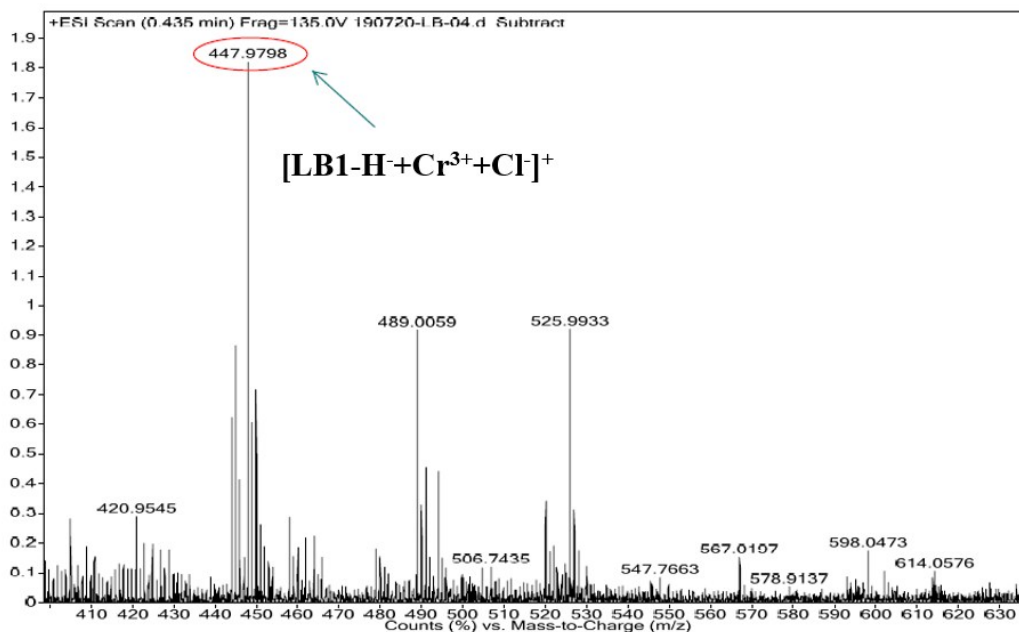

Fig.S15. ESI mass spectrum of complex  $[LB1+Cr^{3+}]$ .

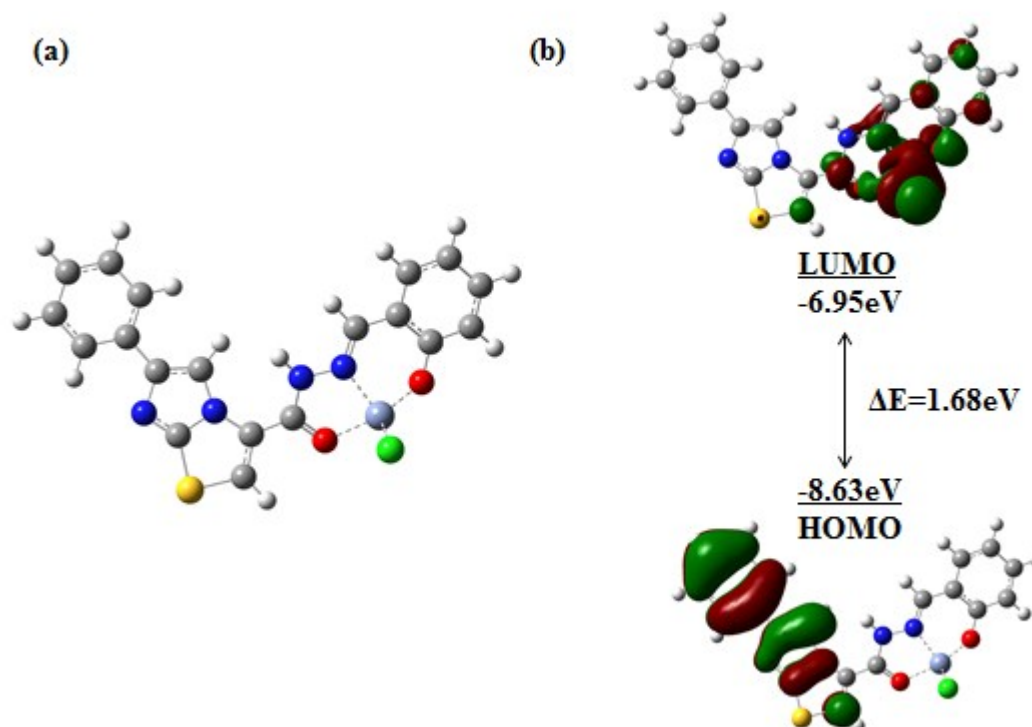

Fig.S16. (a) XYZ coordination of the optimized structure of  $LB1+Cr^{3+}$ .(b) Energy graphic illustration of HOMO and LUMO orbital  $LB1+Cr^{3+}$

Table S1 Determination of the  $In^{3+}$  concentration in tap water samples

| sample | $In^{3+}$ added<br>(mol L <sup>-1</sup> ) | $In^{3+}$ recovered<br>(mol L <sup>-1</sup> ) | Recovery<br>(%) | RSD<br>(%) |
|--------|-------------------------------------------|-----------------------------------------------|-----------------|------------|
|        |                                           |                                               |                 |            |

|   |                    |                      |       |      |
|---|--------------------|----------------------|-------|------|
| 1 | $2 \times 10^{-5}$ | $2.1 \times 10^{-5}$ | 107.4 | 0.53 |
| 2 | $3 \times 10^{-5}$ | $3.1 \times 10^{-5}$ | 105.7 | 0.68 |
| 3 | $4 \times 10^{-5}$ | $3.9 \times 10^{-5}$ | 97.5  | 1.33 |

Table S2 Determination of the Cr<sup>3+</sup> concentration in tap water samples

| sample | Cr <sup>3+</sup> added<br>(mol L <sup>-1</sup> ) | Cr <sup>3+</sup> recovered<br>(mol L <sup>-1</sup> ) | Recovery<br>(%) | RSD<br>(%) |
|--------|--------------------------------------------------|------------------------------------------------------|-----------------|------------|
| 1      | $3 \times 10^{-5}$                               | $3 \times 10^{-5}$                                   | 101.6           | 0.92       |
| 2      | $6 \times 10^{-5}$                               | $6.3 \times 10^{-5}$                                 | 106.3           | 1.31       |
| 3      | $7 \times 10^{-5}$                               | $6.9 \times 10^{-5}$                                 | 98.6            | 1.49       |

Table S3 Determination of the In<sup>3+</sup> concentration in drink water samples

| sample | In <sup>3+</sup> added<br>(mol L <sup>-1</sup> ) | In <sup>3+</sup> recovered<br>(mol L <sup>-1</sup> ) | Recovery<br>(%) | RSD<br>(%) |
|--------|--------------------------------------------------|------------------------------------------------------|-----------------|------------|
| 1      | $1 \times 10^{-5}$                               | $1.0 \times 10^{-5}$                                 | 96.3            | 1.46       |
| 2      | $2 \times 10^{-5}$                               | $2.1 \times 10^{-5}$                                 | 106.8           | 0.35       |
| 3      | $3 \times 10^{-5}$                               | $3.2 \times 10^{-5}$                                 | 107.1           | 1.78       |

Table S4 Determination of the Cr<sup>3+</sup> concentration in drink water samples

| sample | Cr <sup>3+</sup> added<br>(mol L <sup>-1</sup> ) | Cr <sup>3+</sup> recovered<br>(mol L <sup>-1</sup> ) | Recovery<br>(%) | RSD<br>(%) |
|--------|--------------------------------------------------|------------------------------------------------------|-----------------|------------|
| 1      | $1 \times 10^{-5}$                               | $1.0 \times 10^{-5}$                                 | 103.3           | 0.54       |
| 2      | $3 \times 10^{-5}$                               | $2.9 \times 10^{-5}$                                 | 98.9            | 0.11       |
| 3      | $4 \times 10^{-5}$                               | $3.7 \times 10^{-5}$                                 | 91.3            | 0.76       |

Table S5 Comparison of type of indium sensors and their detection limits

| Solvent system                               | Detection limit         | Response | Reference |
|----------------------------------------------|-------------------------|----------|-----------|
| CH <sub>3</sub> CN                           | $1.9 \times 10^{-7}$ M  | turn-off | 5         |
| CH <sub>3</sub> CN/H <sub>2</sub> O(v/v,1:1) | $7 \times 10^{-8}$ M    | off-on   | 6         |
| Methanol/H <sub>2</sub> O(v/v,6:4)           | $1.4 \times 10^{-8}$ M  | -        | 15        |
| Ethanol                                      | $6.1 \times 10^{-7}$ M  | turn-on  | 56        |
| DMF/H <sub>2</sub> O(v/v,9:1)                | $2.59 \times 10^{-9}$ M | off-on   | this work |

Table S6 Comparison of type of chromium sensors and their detection limits

| Solvent system                    | Detection limit         | Response | Reference |
|-----------------------------------|-------------------------|----------|-----------|
| DMF                               | $4.8 \times 10^{-6}$ M  | turn-off | 57        |
| CH <sub>3</sub> CN/HEPES          | $6.09 \times 10^{-6}$ M | off-on   | 58        |
| CH <sub>3</sub> CN/HEPES(v/v,4:6) | $1 \times 10^{-6}$ M    | turn-on  | 59        |
| DMF/Water(v/v,9:1)                | $9 \times 10^{-6}$ M    | turn-off | 60        |
| DMSO/Methanol (v/v,9:1)           | $4 \times 10^{-4}$ M    | turn-on  | 61        |
| DMF/H <sub>2</sub> O(v/v,9:1)     | $8.05 \times 10^{-7}$ M | on-off   | this work |
